# Supplementary material for: Hector V3.2.0: functionality and performance of a reduced-complexity climate model
Source: Copernicus journal article supplement (doi:10.5194/gmd-17-4855-2024), 2024-06-20
Supplement: Supplementary file 1 [file gmd-17-4855-2024-supplement.pdf]

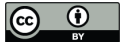

*Supplement of*

## **Hector V3.2.0: functionality and performance of a reduced-complexity climate model**

**Kalyn Dorheim et al.**

*Correspondence to:* Kalyn Dorheim ([kalyn.dorheim@pnnl.gov](mailto:kalyn.dorheim@pnnl.gov))

The copyright of individual parts of the supplement might differ from the article licence.

1 **Table S1. Radiative forcings (RF) included in Hector.**

| Source                                   | Name as it appears in Hector | Description                         |
|------------------------------------------|------------------------------|-------------------------------------|
| Externally defined as user-input         | RF_albedo                    | surface albedo                      |
|                                          | RF_misc                      | RF from miscellaneous sources       |
|                                          | RF_vol                       | RF from volcanic activity           |
| Calculated by Hector from emissions      | RF_aci                       | RF from aerosol-cloud interactions  |
|                                          | RF_BC                        | black carbon RF                     |
|                                          | RF_NH3                       | ammonia RF                          |
|                                          | RF_OC                        | organic carbon RF                   |
|                                          | RF_SO2                       | sulfur dioxide RF                   |
| Calculated by Hector from concentrations | FCH4                         | methane RF                          |
|                                          | RF_CO2                       | carbon dioxide RF                   |
|                                          | RF_H2O_strat                 | stratospheric water vapor RF        |
|                                          | RF_N2O                       | nitrous oxide RF                    |
|                                          | RF_O3_trop                   | tropospheric ozone RF               |
|                                          | FadjC2F6                     | C <sub>2</sub> F <sub>6</sub> RF    |
|                                          | FadjCF4                      | CF <sub>4</sub> RF                  |
|                                          | FadjCFC11                    | CFC11 RF                            |
|                                          | FadjCFC113                   | CFC113 RF                           |
|                                          | FadjCFC114                   | CFC114 RF                           |
|                                          | FadjCFC115                   | CFC115 RF                           |
|                                          | FadjCFC12                    | CFC12 RF                            |
|                                          | FadjCH3Br                    | CH <sub>3</sub> Br RF               |
|                                          | FadjCCl4                     | CCl <sub>4</sub> RF                 |
|                                          | FadjCH3CCl3                  | CH <sub>3</sub> CCl <sub>3</sub> RF |
|                                          | FadjCH3Cl                    | CH <sub>3</sub> Cl RF               |
|                                          | Fadjhalon1211                | halocarbon 1211 RF                  |
|                                          | Fadjhalon1301                | halocarbon 1301 RF                  |
|                                          | Fadjhalon2402                | halocarbon 2402 RF                  |

|  |                     |                    |
|--|---------------------|--------------------|
|  | FadjHCFC141b        | HCFC141b RF        |
|  | FadjHCFC142b        | HCFC142b RF        |
|  | FadjHCFC22          | HCFC22 RF          |
|  | FadjHFC125          | HFC125 RF          |
|  | FadjHFC134a         | HFC134a RF         |
|  | FadjHFC143a         | HFC143a RF         |
|  | FadjHFC227ea        | HFC227ea RF        |
|  | FadjHFC23           | HFC23 RF           |
|  | FadjHFC245fa        | HFC245fa RF        |
|  | FadjHFC32           | HFC32 RF           |
|  | FadjHFC4310         | HFC4310 RF         |
|  | FadjSF <sub>6</sub> | SF <sub>6</sub> RF |

2

3

4 **Table S2: Equations and parameter values for N<sub>2</sub>O.**

$$\frac{d[N_2O]}{dt} = \frac{E_{N_2O}(t)}{4.8} - \frac{[N_2O](t)}{\tau_{N_2O}} \quad (S1)$$

$$\tau_{N_2O} = \tau_0 \times \left( \frac{[N_2O](t)}{[N_2O]_0} \right)^{-0.05} \quad (S2)$$

$$SARF_{N_2O}(t) = \left( a_2 \sqrt{[CO_2](t)} + b_2 \sqrt{[N_2O](t)} + c_2 \sqrt{[CH_4](t)} + d_2 \right) \left( \sqrt{[N_2O](t)} - \sqrt{[N_2O]_0} \right) \quad (S3)$$

$$RF_{N_2O}(t) = \delta_{N_2O} SARF_{N_2O}(t) + SARF_{N_2O}(t) \quad (S4)$$

5

| <b>(S1) Change in N<sub>2</sub>O concentrations from (Hartin et al., 2015)</b>                                |                          |                                       |                       |
|---------------------------------------------------------------------------------------------------------------|--------------------------|---------------------------------------|-----------------------|
| $E_{N_2O}$ (total N <sub>2</sub> O emissions)                                                                 | Input                    | Tg N yr <sup>-1</sup>                 |                       |
| <b>(S2) Lifetime of N<sub>2</sub>O from (Hartin et al., 2015)</b>                                             |                          |                                       |                       |
| $\tau_0$ (initial N <sub>2</sub> O lifetime)                                                                  | 132                      | years                                 | (Hartin et al., 2015) |
| $[N_2O]_0$ (preindustrial N <sub>2</sub> O concentrations)                                                    | 273.87                   | ppbv                                  | (Smith et al., 2021)  |
| <b>(S3) Stratospheric-temperature-adjusted radiative for N<sub>2</sub>O forcing from (Smith et al., 2021)</b> |                          |                                       |                       |
| $a_2$                                                                                                         | $-3.4197 \times 10^{-4}$ | W m <sup>-2</sup> ppm <sup>-1</sup>   | (Smith et al., 2021)  |
| $b_2$                                                                                                         | $2.5455 \times 10^{-4}$  | W m <sup>-2</sup> ppb <sup>-1</sup>   |                       |
| $c_2$                                                                                                         | $-2.4357 \times 10^{-4}$ | W m <sup>-2</sup> ppb <sup>-1</sup>   |                       |
| $d_2$                                                                                                         | 0.12173                  | W m <sup>-2</sup> ppb <sup>-1/2</sup> |                       |
| $[CO_2]$ (atmospheric CO <sub>2</sub> concentrations)                                                         | Equation 20              | ppmv                                  |                       |
| $[CH_4]$ (CH <sub>4</sub> concentrations)                                                                     | Equation 5               | ppbv                                  |                       |
| <b>(S4) Effective Radiative Forcing for N<sub>2</sub>O from (Smith et al., 2021)</b>                          |                          |                                       |                       |
| $\delta_{N_2O}$                                                                                               | 0.07                     | unitless                              | (Smith et al., 2021)  |

6

7 **Table S3: Equations and parameter values for CH<sub>4</sub>.**

$$\frac{d[CH_4]}{dt} = \frac{E_{CH_4}}{2.78} - \frac{[CH_4](t)}{\tau_{OH}} - \frac{[CH_4](t)}{\tau_{strat}} - \frac{[CH_4](t)}{\tau_{soil}} \quad (S5)$$

$$\tau_{OH}(t) = \tau_{OH_0} \times e^{0.32 \ln\left(\frac{[CH_4](t)}{[CH_4]_0}\right) - 0.0042(E_{NO_x}(t) - E_{NO_x_0}) + 0.000105(E_{CO}(t) - E_{CO_0}) + 0.000315(E_{NMVOC}(t) - E_{NMVOC_0})} \quad (S6)$$

$$SARF_{CH_4} = (a_3 \sqrt{[CH_4](t)} + b_3 \sqrt{[N_2O](t)} + d_3) (\sqrt{[CH_4](t)} - \sqrt{[CH_4]_0}) \quad (S7)$$

$$RF_{CH_4} = (\delta_{CH_4} + 1) SARF_{CH_4} \quad (S8)$$

8

| <b>(S5) Change in CH<sub>4</sub> concentrations from (Hartin et al., 2015)</b>                                        |                          |                                       |                       |
|-----------------------------------------------------------------------------------------------------------------------|--------------------------|---------------------------------------|-----------------------|
| $E_{CH_4}$ (total CH <sub>4</sub> emissions)                                                                          | Input                    | Tg CH <sub>4</sub>                    | (Hartin et al., 2015) |
| $\tau_{OH}$ (lifetime of tropospheric sink)                                                                           | Equation 6               | years                                 |                       |
| $\tau_{strat}$ (lifetime stratospheric sink)                                                                          | 120                      |                                       |                       |
| $\tau_{soil}$ (lifetime soil sink)                                                                                    | 160                      |                                       |                       |
| <b>(S6) Lifetimes of the tropospheric sink from (Hartin et al., 2015)</b>                                             |                          |                                       |                       |
| $\tau_{OH_0}$ (initial lifetime)                                                                                      | 6.6                      | years                                 | (Hartin et al., 2015) |
| $[CH_4]_0$ (preindustrial CH <sub>4</sub> concentrations)                                                             | 731.41                   | ppb                                   | (Smith et al., 2021)  |
| $E_{NO_x}$ (NO <sub>x</sub> emissions)                                                                                | Inputs                   | Tg                                    |                       |
| $E_{NO_x_0}$ (NO <sub>x</sub> emissions in 1745)                                                                      |                          |                                       |                       |
| $E_{CO}$ (CO emissions)                                                                                               |                          |                                       |                       |
| $E_{CO_0}$ (CO emissions in 1745)                                                                                     |                          |                                       |                       |
| $E_{NMVOC}$ (Emissions of non-methane volatile organic compounds)                                                     |                          |                                       |                       |
| $E_{NMVOC}$ (Emissions of non-methane volatile organic compounds in 1745)                                             |                          |                                       |                       |
|                                                                                                                       |                          |                                       |                       |
| <b>(S7) Stratospheric-temperature-adjusted radiative forcing for CH<sub>4</sub> forcing from (Smith et al., 2021)</b> |                          |                                       |                       |
| $a_3$                                                                                                                 | $-8.9603 \times 10^{-5}$ | W m <sup>-2</sup> ppb <sup>-1</sup>   | (Smith et al., 2021)  |
| $b_3$                                                                                                                 | $-1.2462 \times 10^{-4}$ | W m <sup>-2</sup> ppb <sup>-1</sup>   |                       |
| $d_3$                                                                                                                 | 0.045194                 | W m <sup>-2</sup> ppb <sup>-1/2</sup> |                       |
| <b>(S8) Effective radiative forcing for CH<sub>4</sub> from (Smith et al., 2021)</b>                                  |                          |                                       |                       |
| $\delta_{CH_4}$                                                                                                       | -0.14                    | unitless                              | (Smith et al., 2021)  |

9  
10  
11  
12

13 **Table S4: Equations and parameter values for tropospheric O<sub>3</sub> and stratospheric water vapor.**

$$[O_3](t) = 5ln [CH_4](t) + 0.125E_{NO_x}(t) + 0.0011E_{CO}(t) + 0.0033E_{NMVOC}(t) \quad (S9)$$

$$RF_{O_3}(t) = 0.042 [O_3](t) \quad (S10)$$

$$RF_{stratH_2O} = 0.0485 \frac{[CH_4](t) - [CH_4]_0}{1831 - [CH_4]_0} \quad (S11)$$

14

| <b>(S9) Tropospheric ozone concentrations</b>                                                     |            |                   |                       |
|---------------------------------------------------------------------------------------------------|------------|-------------------|-----------------------|
| $[CH_4]$ (CH <sub>4</sub> concentrations)                                                         | Equation 5 | ppb               |                       |
| $[CH_4]_0$ (preindustrial CH <sub>4</sub> concentrations)                                         | 731.41     | ppb               | (Smith et al., 2021)  |
| $E_{NO_x}$ (NO <sub>x</sub> emissions)                                                            | Inputs     | Tg                |                       |
| $E_{CO}$ (CO emissions)                                                                           |            |                   |                       |
| $E_{NMVOC}$ (volatile organic compounds)                                                          |            |                   |                       |
| <b>(S10) Effective radiative forcing of tropospheric O<sub>3</sub> from (Hartin et al., 2015)</b> |            |                   |                       |
| $[O_3]$ (tropospheric O <sub>3</sub> concentrations)                                              | Equation 9 | DU O <sub>3</sub> | (Hartin et al., 2015) |
| <b>(S11) Effective radiative forcing stratospheric water vapor from (Hartin et al., 2015)</b>     |            |                   |                       |

15

16

17 **Table S5: Equations and parameter values for aerosol forcings.**

18 Direct aerosol radiative forcings for black carbon (BC), organic carbon (OC), SO<sub>2</sub>, and NH<sub>3</sub>, are modeled as a product of the  
 19 emissions of that aerosol in that timestep (E; in units of Tg) and the aerosol's specific radiative efficiency,  $\rho$ . Hector 3.0 is  
 20 calibrated to forcing values in the AR6, which were informed by analysis of ESM model results as documented in Smith et  
 21 al. (2021). We adjust aerosol forcing parameters in this version of the model from the values documented in Smith et al.  
 22 (2021) to account for the new analysis by (Zelinka et al., 2023). Zelinka et al. find, due to a coding error, a higher absorbing  
 23 forcing, which is largely countered by a larger cloud indirect forcing. We therefore scale the magnitude of BC, other cooling  
 24 aerosols, and F\_ACI by the ratio of average CMIP6 model values from Zelinka et al. (2023, Table 2) and Smith et al. (2020)  
 25 (Table 6). These changes largely offset each other, but result in a slightly higher net negative forcing for the current day and  
 26 also result in slightly different total aerosol forcing pathways over time.  
 27

$$RF_{BC}(t) = \rho_{BC}E_{BC}(t) \quad (S12)$$

$$RF_{OC}(t) = \rho_{OC}E_{OC}(t) \quad (S13)$$

$$RF_{SO_2}(t) = \rho_{SO_2}E_{SO_2}(t) \quad (S14)$$

$$RF_{NH_3}(t) = \rho_{NH_3}E_{NH_3}(t) \quad (S15)$$

$$RF_{aci}(t) = -\rho_{aci} \ln \left( 1 + \frac{E_{SO_2}(t)}{s_{SO_2}} + \frac{E_{BC+OC}(t)}{s_{BC+OC}} \right) \quad (S16)$$

28

| <b>(S12) Black Carbon Effective Radiative Forcing based on (Smith et al., 2021)</b>                    |               |                                                       |                      |
|--------------------------------------------------------------------------------------------------------|---------------|-------------------------------------------------------|----------------------|
| $\rho_{BC}$                                                                                            | 0.06386286    | W yr m <sup>-2</sup> Tg C <sup>-1</sup>               | See text above       |
| $E_{BC}$ (Black Carbon Emissions)                                                                      | Input         | Tg C                                                  |                      |
| <b>(S13) Organic Carbon Effective Radiative Forcing based on (Smith et al., 2021)</b>                  |               |                                                       |                      |
| $\rho_{OC}$                                                                                            | -0.006407143  | W yr m <sup>-2</sup> Tg C <sup>-1</sup>               | See text above       |
| $E_{OC}$ (Organic Carbon Emissions)                                                                    | Input         | Tg C                                                  |                      |
| <b>(S14) SO<sub>2</sub> Effective Radiative Forcing based on (Smith et al., 2021)</b>                  |               |                                                       |                      |
| $\rho_{SO_2}$                                                                                          | -7.469841e-06 | W yr m <sup>-2</sup> Gg S <sup>-1</sup>               | See text above       |
| $E_{SO_2}$ (SO <sub>2</sub> emissions)                                                                 | Input         | Gg S                                                  |                      |
| <b>(S15) NH<sub>3</sub> Effective Radiative Forcing based on (Smith et al., 2021)</b>                  |               |                                                       |                      |
| $\rho_{NH_3}$                                                                                          | -0.002146032  | W yr m <sup>-2</sup> Tg NH <sub>3</sub> <sup>-1</sup> | See text above       |
| $E_{NH_3}$                                                                                             | Input         | Tg                                                    |                      |
| <b>(S16) Effective Radiative Forcing from aerosol cloud interactions based on (Smith et al., 2021)</b> |               |                                                       |                      |
| $\rho_{aci}$                                                                                           | 2.279759      | unitless                                              | See text above       |
| $s_{SO_2}$                                                                                             | 130303.3      | Gg S                                                  | (Smith et al., 2021) |

|             |              |      |  |
|-------------|--------------|------|--|
| $s_{BC+OC}$ | 111.05064063 | Tg C |  |
|-------------|--------------|------|--|

29

30 **Table S6: Equations and parameters for halocarbon concentrations and forcing.**

$$C_i(t) = C_{i0} \times e^{\frac{-t}{\tau_i}} + E_i \times \tau_i \times \left(1 - e^{\frac{-t}{\tau_i}}\right) \quad (\text{S17})$$

$$SARF_i = \rho_i C_i(t) \quad (\text{S18})$$

$$RF_i = SARF_i + \delta_i SARF_i \quad (\text{S19})$$

31

|                                                                                                              |                                                             |
|--------------------------------------------------------------------------------------------------------------|-------------------------------------------------------------|
| <b>(S17) Concentration for single halocarbon (<math>i</math>) (Hartin et al., 2015)</b>                      |                                                             |
|                                                                                                              | $C_{i0}$ (pre industrial concentration for halocarbon $i$ ) |
|                                                                                                              | $\tau_i$ (life time for halocarbon $i$ )                    |
|                                                                                                              | $E_i$ (emissions for halocarbon $i$ )                       |
| <b>(S18) Stratospheric-temperature-adjusted radiative forcing for halocarbons from (Hartin et al., 2015)</b> |                                                             |
|                                                                                                              | $C_i$ (concentration for halocarbon $i$ )                   |
| <b>(S19) Effective radiative forcing for halocarbons based on (Smith et al., 2021)</b>                       |                                                             |

32

33

34 **Table S7: Parameters for halocarbon concentrations and forcing.**

35

| Halocarbon (i)                | $\tau$ (lifetime) | $\rho W m^{-2} ppt^{-1}$ (Radiative efficiency) | $\delta$ unitless (tropospheric adjustments) | Source               |
|-------------------------------|-------------------|-------------------------------------------------|----------------------------------------------|----------------------|
| CF <sub>4</sub>               | 50000.0           | 0.000099                                        | 0                                            | (Smith et al., 2021) |
| C <sub>2</sub> F <sub>6</sub> | 10000.0           | 0.000261                                        | 0                                            |                      |
| HFC-23                        | 228.0             | 0.000191                                        | 0                                            |                      |
| HFC-32                        | 5.4               | 0.000111                                        | 0                                            |                      |
| HFC-4310                      | 17.0              | 0.000357                                        | 0                                            |                      |
| HFC-125                       | 30.0              | 0.000234                                        | 0                                            |                      |
| HFC-134a                      | 14.0              | 0.000167                                        | 0                                            |                      |



|                                  |        |          |      |
|----------------------------------|--------|----------|------|
| HFC-143a                         | 51.0   | 0.000168 | 0    |
| HFC-227ea                        | 36.0   | 0.000273 | 0    |
| HFC-245fa                        | 7.9    | 0.000245 | 0    |
| SF <sub>6</sub>                  | 3200.0 | 0.000567 | 0    |
| CFC-11                           | 52.0   | 0.000259 | 0.13 |
| CFC-12                           | 102.0  | 0.00032  | 0.13 |
| CFC-113                          | 93.0   | 0.000301 | 0    |
| CFC-114                          | 189    | 0.000314 | 0    |
| CFC-115                          | 540    | 0.000246 | 0    |
| CCl <sub>4</sub>                 | 32     | 0.000166 | 0    |
| CH <sub>3</sub> CCl <sub>3</sub> | 5      | 0.000065 | 0    |
| halon-1211                       | 16.0   | 0.0003   | 0    |
| halon-1301                       | 72.0   | 0.000299 | 0    |
| halon-2402                       | 28.0   | 0.000312 | 0    |
| HCFC-22                          | 11.9   | 0.000214 | 0    |
| HCFC-141b                        | 9.4    | 0.000161 | 0    |
| HCFC-142b                        | 18.0   | 0.000193 | 0    |
| CH <sub>3</sub> Cl               | 0.9    | 0.000005 | 0    |
| CH <sub>3</sub> Br               | 0.8    | 0.000004 | 0    |

36  
37

$$\frac{d[CO_2]}{dt} = F_E(t) + F_O(t) + F_L(t) \quad (S20)$$

$$F_E(t) = E_{FFI}(t) - U_{DACCS}(t) \quad (S21)$$

$$F_O(t) = E_{HL}(t) - U_{HL}(t) + E_{LL}(t) - U_{LL}(t) \quad (S22)$$

$$F_L(t) = E_{LUC}(t) + Rh_d(t) + Rh_s(t) - NPP(t) - U_{LUC}(t) \quad (S23)$$

$$NPP(t) = NPP_0 \times f([CO_2](t), \beta) \times f(LUC_v(t)) \quad (S24)$$

$$f([CO_2](t), \beta) = 1 + \beta \times \log\left(\frac{[CO_2](t)}{C_0}\right) \quad (S25)$$

$$f(LUC(t)_v) = \frac{C_v(t=0) - \sum_{i=0}^t LUC_v(t)}{C_v(t=0)} \quad (S26)$$

$$\frac{C_v}{dt} = f_{nv}NPP(t) - (f_{vd} + f_{vs})C_v(t) - f_{lv}(t)E_{LUC}(t) + f_{lv}(t)U_{LUC}(t) \quad (S27)$$

$$f_{lv}(t) = \frac{C_v(t)}{C_v(t) + C_d(t) + C_s(t)} \quad (S28)$$

$$Rh_s(t) = f_{rs}C_s(t)Q_{10}^{T_{land}(t)/10} \quad (S29)$$

$$Rh_d(t) = f_{ds}C_d(t)Q_{10}^{T_{land}(t)/10} \quad (S30)$$

$$\frac{C_d}{dt} = f_{nd}NPP(t) + f_{vd}C_v(t) - f_{ds}C_d(t) - Rh_d(t) - f_{id}(t)E_{LUC}(t) + f_{id}(t)U_{LUC}(t) \quad (S31)$$

$$f_{id}(t) = \frac{C_d(t)}{C_v(t) + C_d(t) + C_s(t)} \quad (S32)$$

$$\frac{C_s}{dt} = f_{ns}NPP(t) + f_{vs}C_v(t) + f_{ds}C_d(t) - Rh_s(t) - f_{is}(t)E_{LUC}(t) + f_{is}(t)U_{LUC}(t) \quad (S33)$$

$$f_{is}(t) = \frac{C_s(t)}{C_v(t) + C_d(t) + C_s(t)} \quad (S34)$$

$$\frac{C_{earth}}{dt} = U_{DACCS}(t) - E_{FFI}(t) \quad (S35)$$

$$F_i(t) = \kappa(t)\alpha(t)\Delta pCO_2(t) \quad (S36)$$

| <b>(S20) Change in atmospheric carbon dioxide concentrations</b>                                        |             |                       |  |
|---------------------------------------------------------------------------------------------------------|-------------|-----------------------|--|
| $F_E$ (net flux of carbon from fossil fuel and industry emissions or direct air capture carbon storage) | Equation 21 | Pg C yr <sup>-1</sup> |  |

|                                                                                                                                                                                                                                                |             |                       |                                            |
|------------------------------------------------------------------------------------------------------------------------------------------------------------------------------------------------------------------------------------------------|-------------|-----------------------|--------------------------------------------|
| $F_O$ (net flux of carbon from the ocean to the atmosphere)                                                                                                                                                                                    | Equation 22 |                       |                                            |
| $F_L$ (net flux of carbon from the terrestrial carbon cycle to the atmosphere)                                                                                                                                                                 | Equation 23 |                       |                                            |
| <b>(S21) <math>F_E</math> the net carbon flux from the earth pool via fossil fuel and industry emissions or direct air capture carbon storage (daccs), the earth pool represents carbon that was not previously active in the carbon cycle</b> |             |                       |                                            |
| $E_{FFI}$ (CO <sub>2</sub> fossil fuel and industry emissions)                                                                                                                                                                                 | Input       | Pg C yr <sup>-1</sup> |                                            |
| $U_{DACCS}$ (CO <sub>2</sub> uptake by direct air capture carbon storage technologies)                                                                                                                                                         |             |                       |                                            |
| <b>(S22) Net flux of carbon from the ocean to the atmosphere, a positive <math>F_O</math> represents emissions to the atmosphere</b>                                                                                                           |             |                       |                                            |
| $E_{HL}$ & $E_{LL}(t)$ (carbon gas exchange from the high latitude (HL) and low latitude (LL) ocean surface into the atmosphere)                                                                                                               | Equation 35 | Pg C yr <sup>-1</sup> |                                            |
| $U_{HL}$ & $U_{LL}$ (uptake of carbon into the HL and LL ocean surfaces)                                                                                                                                                                       | Equation 35 |                       |                                            |
| <b>(S23) CO<sub>2</sub> flux from the terrestrial carbon cycle to the atmosphere</b>                                                                                                                                                           |             |                       |                                            |
| $E_{LUC}$ (CO <sub>2</sub> emissions from land use change)                                                                                                                                                                                     | Input       | Pg C yr <sup>-1</sup> |                                            |
| $Rh_d$ (carbon flux from decomposition of detritus)                                                                                                                                                                                            | Equation 30 |                       |                                            |
| $Rh_s$ (carbon flux from decomposition of soil)                                                                                                                                                                                                | Equation 29 |                       |                                            |
| $NPP$ (net primary production)                                                                                                                                                                                                                 | Equation 24 |                       |                                            |
| $U_{LUC}$ (carbon flux, uptake by the terrestrial biosphere via land use change)                                                                                                                                                               | Input       |                       |                                            |
| <b>(S24) Net Primary Production</b>                                                                                                                                                                                                            |             |                       |                                            |
| $NPP_0$ (pre-industrial NPP)                                                                                                                                                                                                                   | 56.2        | Pg C yr <sup>-1</sup> | (Ito, 2011)                                |
| $f([CO_2](t), \beta)$ (effect of atmospheric [CO <sub>2</sub> ] on plant growth)                                                                                                                                                               | Equation 25 | unitless              |                                            |
| $f(LUC_v(t))$ (effect of land use change on the terrestrial carbon pools)                                                                                                                                                                      | Equation 26 |                       |                                            |
| <b>(S25) Effect of atmospheric [CO<sub>2</sub>] on plant growth</b>                                                                                                                                                                            |             |                       |                                            |
| $\beta$ (CO <sub>2</sub> fertilization factor)                                                                                                                                                                                                 | 0.55        | unitless              | See section 2.2.6 of main text for details |
| $[CO_2]$ (CO <sub>2</sub> concentrations)                                                                                                                                                                                                      | Equation 20 | ppmv                  |                                            |
| $C_0$ (preindustrial CO <sub>2</sub> concentration)                                                                                                                                                                                            | 277.15      |                       | (Smith et al., 2021)                       |
| <b>(S26) Effect of land use change on the size of terrestrial vegetation carbon pool</b>                                                                                                                                                       |             |                       |                                            |
| $C_v(t = 0)$ (Initial size of the vegetation carbon pool)                                                                                                                                                                                      | 550         | Pg C                  | (Hartin et al., 2015)                      |

|                                                                                      |             |          |                                            |
|--------------------------------------------------------------------------------------|-------------|----------|--------------------------------------------|
| $\sum_{i=0}^t LUC_v(t)$ (total change in the vegetation pool due to land use change) | Input       |          |                                            |
| <b>(S27) Change in the vegetation carbon pool</b>                                    |             |          |                                            |
| $f_{nv}$ (fraction of NPP to vegetation pool)                                        | 0.35        | unitless | (Hartin et al., 2015)                      |
| $f_{vd}$ (fraction of vegetation carbon that is transferred to detritus)             | 0.034       |          |                                            |
| $f_{vs}$ (fraction of vegetation carbon that is transferred to soil)                 | 0.001       |          |                                            |
| $f_{lv}$ (fraction of vegetation lost to land use changes)                           | Equation 28 |          | See section 2.2.2 of main text for details |
| <b>(S28) Fraction of the vegetation pool gained/lost due to land use changes</b>     |             |          |                                            |
| $C_v$ (size of the vegetation carbon pool)                                           | Equation 27 | Pg C     | (Hartin et al., 2015)                      |
| $C_d$ (size of the detritus carbon pool)                                             | Equation 31 |          |                                            |
| $C_s$ (size of the soil carbon pool)                                                 | Equation 33 |          |                                            |
| <b>(S29) Soil heterotrophic respiration</b>                                          |             |          |                                            |
| $f_{rs}$ (fraction of respiration carbon transferred to soil)                        | 0.02        | unitless | (Hartin et al., 2015)                      |
| $Q_{10}$ (Heterotrophic respiration temperature sensitivity factor)                  | 2.2         |          | See section 2.2.6 of main text for details |
| $C_s$ (size of the soil carbon pool)                                                 | Equation 33 | Pg C     | (Hartin et al., 2015)                      |
| $T_{land}$ (land surface temperature)                                                | -           | °C       |                                            |
| <b>(S30) Detritus heterotrophic respiration</b>                                      |             |          |                                            |
| $f_{ds}$ (fraction of respiration carbon transferred to detritus)                    | 0.6         | unitless | (Hartin et al., 2015)                      |
| $C_d$ (size of the detritus carbon pool)                                             | Equation 31 | Pg C     |                                            |
| $Q_{10}$ (Heterotrophic respiration temperature sensitivity factor)                  | 2.2         |          | See section 2.2.6 of main text for details |
| <b>(S31) Change in the size of the detritus pool</b>                                 |             |          |                                            |
| $f_{nd}$ (fraction of respiration carbon that is transferred to detritus)            | 0.25        | unitless | (Hartin et al., 2015)                      |
| $f_{vs}$ (fraction of vegetation carbon that is transferred to soil)                 | 0.001       |          |                                            |
| $f_{ds}$ (fraction of detritus carbon that is transferred to soil)                   | 0.60        |          |                                            |
| $C_v$ (size of the vegetation carbon pool)                                           | Equation 27 | Pg C     |                                            |
| $f_{ld}$ (fraction detritus pool lost or gained from land use change)                | Equation 32 | unitless |                                            |
| $E_{LUC}$ (land use change emissions)                                                | Input       | Pg C     |                                            |
| $U_{LUC}$ (uptake land use change emissions)                                         | Input       |          |                                            |

| <b>(S32) Fraction of land use change emissions/uptake portioned to detritus</b>                     |                       |          |                       |      |                       |
|-----------------------------------------------------------------------------------------------------|-----------------------|----------|-----------------------|------|-----------------------|
| $C_v$ (size of the vegetation carbon pool)                                                          | Equation 27           | Pg C     | (Hartin et al., 2015) |      |                       |
| $C_d$ (size of the detritus carbon pool)                                                            | Equation 31           |          |                       |      |                       |
| $C_s$ (size of the soil carbon pool)                                                                | Equation 33           |          |                       |      |                       |
| <b>(S33) Change in the size of the soil pool</b>                                                    |                       |          |                       |      |                       |
| $f_{ns}$ (fraction of NPP carbon that is transferred to soil)                                       | 0.05                  | unitless | (Hartin et al., 2015) |      |                       |
| $f_{vs}$ (fraction of vegetation carbon 0.001 that is transferred to soil)                          | 0.001                 |          |                       |      |                       |
| $f_{ds}$ (fraction of detritus carbon that is 0.60 the following fractions (f) transferred to soil) | 0.60                  |          |                       |      |                       |
| $NPP$ (net primary production)                                                                      | Equation 24           | Pg C     |                       |      |                       |
| $C_v$ (size of the vegetation carbon pool)                                                          | Equation 27           |          |                       |      |                       |
| $C_d$ (size of the detritus carbon pool)                                                            | Equation 31           |          |                       |      |                       |
| $Rh_s$ (Soil heterotrophic respiration)                                                             | Equation 29           |          |                       |      |                       |
| $f_{ls}$ (fraction of land use change flux from soil)                                               | Equation 34           |          |                       |      |                       |
| $E_{LUC}$ (land use change emissions)                                                               | inputs                |          |                       |      |                       |
| $U_{LUC}$ (uptake land use change emissions)                                                        |                       |          |                       |      |                       |
| <b>(S34) fraction of land use change flux from soil</b>                                             |                       |          |                       |      |                       |
| $C_v$ (size of the vegetation carbon pool)                                                          | Equation 27           |          |                       | Pg C | (Hartin et al., 2015) |
| $C_d$ (size of the detritus carbon pool)                                                            | Equation 31           |          |                       |      |                       |
| $C_s$ (size of the soil carbon pool)                                                                | Equation 33           |          |                       |      |                       |
| <b>(S35) Change in the earth carbon pool</b>                                                        |                       |          |                       |      |                       |
| $U_{DACCS}$ (Uptake of C by earth pool due to carbon capture storage)                               | Input                 | Pg C     |                       |      |                       |
| $E_{FFI}$ (C emissions from fossil fuel and industry)                                               |                       |          |                       |      |                       |
| <b>(S36) Flux of CO<sub>2</sub> for each box ocean surface box</b>                                  |                       |          |                       |      |                       |
| $\kappa$ (CO <sub>2</sub> gas-transfer velocity)                                                    | (Hartin et al., 2016) |          |                       |      |                       |
| $\alpha$ (solubility of CO <sub>2</sub> in water based on salinity, temperature, and pressure)      |                       |          |                       |      |                       |
| $\Delta pCO_2$ (atmosphere–ocean gradient of partial pressure of [CO <sub>2</sub> ])                |                       |          |                       |      |                       |

41 **Table S9: Equations and parameter values used to calculate CO<sub>2</sub> radiative forcing.**

$$C_{\alpha \max} = C_0 - \frac{b_1}{2a_1} \quad (\text{S37})$$

$$\alpha' = \begin{cases} d_1 - \frac{b_1^2}{4a_1}, C_{atm}(t) > C_{\alpha \max} \\ d_1 + a_1(C_{atm}(t) - C_0)^2 + b_1(C_{atm}(t) - C_0), C_0 < C_{atm}(t) < C_{\alpha \max} \\ d_1, C_{atm}(t) \leq C_0 \end{cases} \quad (\text{S38})$$

$$\alpha_{N_2O} = c_1 \sqrt{N(t)} \quad (\text{S39})$$

$$SARF_{CO_2}(t) = (\alpha' + \alpha_{N_2O}) \ln \left( \frac{C_{atm}(t)}{C_0} \right) \quad (\text{S40})$$

$$RF_{CO_2}(t) = \delta_{CO_2} SARF_{CO_2}(t) + SARF_{CO_2}(t) \quad (\text{S41})$$

42

| (S37-S41) Equations from (Smith et al., 2021) used to calculate the effective radiative forcing for CO <sub>2</sub> |                          |                                     |                     |
|---------------------------------------------------------------------------------------------------------------------|--------------------------|-------------------------------------|---------------------|
| $a_1$                                                                                                               | $-2.4785 \times 7$       | $\text{W m}^{-2} \text{ppm}^{-2}$   | (Smith et al. 2021) |
| $b_1$                                                                                                               | $7.5906 \times 10^{-4}$  | $\text{W m}^{-2} \text{ppm}^{-1}$   |                     |
| $c_1$                                                                                                               | $-2.1492 \times 10^{-3}$ | $\text{W m}^{-2} \text{ppb}^{-1/2}$ |                     |
| $d_1$                                                                                                               | 5.2488                   | $\text{W m}^{-2}$                   |                     |
| $C_0$ (pre-industrial [CO <sub>2</sub> ])                                                                           | 277.15                   | ppm                                 |                     |
| $\delta_{CO_2}$                                                                                                     | 0.05                     | unitless                            |                     |
| $N(t)$ (N <sub>2</sub> O concentrations)                                                                            | Equation 1               | ppbv yr <sup>-1</sup>               |                     |
| $C_{atm}(t)$ (CO <sub>2</sub> concentrations)                                                                       | Equation 20              | ppmv yr <sup>-1</sup>               |                     |

43

44 **Table S10: Equations and parameter values related to climate dynamics**

$$RF_{total}(t) = \left[ \sum_i^{all\ GHGs} RF_i(t) \right] + (1 - \alpha) \left[ \sum_i^{all\ aerosols} RF_i(t) \right] + (1 - \nu)RF_{vol}(t) + RF_{albedo}(t) \quad (S42)$$

$$C_{AL}\dot{T}_L = RF_{total} - \lambda_L T_L - \frac{k}{f_L}(T_L - b_{SI}T_S) \quad (S43)$$

$$C_{AS}\dot{T}_S = RF_{total} - \lambda_S T_S - \frac{k}{1 - f_L}(b_{SI}T_S - T_L) - F_O \quad (S44)$$

$$F_O(t) = -c_v \kappa_v \frac{d}{dz} T_O(z, t) \Big|_{z=0} \quad (S45)$$

$$k = b_k - a_k \lambda_L \quad (S46)$$

$$\lambda_L = \frac{Q_{2x}}{T_{L,2x}} - \frac{k}{f_L} \frac{T_{L,2x} - b_{SI}T_{S,2x}}{T_{L,2x}} \quad (S47)$$

$$\lambda_S = \frac{Q_{2x}}{T_{S,2x}} - \frac{k}{1 - f_L} \frac{T_{L,2x} - b_{SI}T_{S,2x}}{T_{S,2x}} \quad (S48)$$

45

| <b>(S42) Total effective radiative forcing</b>                                      |                                   |                                      |                       |
|-------------------------------------------------------------------------------------|-----------------------------------|--------------------------------------|-----------------------|
| $\sum_i^{all\ GHGs} RF_i(t)$ (the sum of ERF for all GHGs)                          | Equations (S4, S8, S11, S19, S41) | W m <sup>-2</sup>                    |                       |
| $\sum_i^{all\ aerosols} RF_i(t)$ (the sum of ERF for all aerosols)                  | Equations (S12-S16)               |                                      |                       |
| $\alpha$ (aerosol uncertainty factor)                                               | 1                                 | unitless                             |                       |
| $\nu$ (volcanic uncertainty factor)                                                 | 1                                 |                                      |                       |
| $RF_{vol}(t)$ (volcanic radiative forcing)                                          | Input                             | W m <sup>-2</sup>                    |                       |
| $RF_{albedo}(t)$ (radiative forcing from albedo)                                    |                                   |                                      |                       |
| <b>(S43) Heat flux/temperature change over land based on (Tanaka et al., 2007)</b>  |                                   |                                      |                       |
| <b>(S44) Heat flux/temperature change over ocean based on (Tanaka et al., 2007)</b> |                                   |                                      |                       |
| <b>(S45) Heat flux into the interior ocean based on (Tanaka et al., 2007)</b>       |                                   |                                      |                       |
| <b>(S46) Land-sea heat exchange coefficient based on (Tanaka et al., 2007)</b>      |                                   |                                      |                       |
| <b>(S47) Climate feedback parameter over land based on (Tanaka et al., 2007)</b>    |                                   |                                      |                       |
| <b>(S48) Climate feedback parameter over sea based on (Tanaka et al., 2007)</b>     |                                   |                                      |                       |
| $C_{AL}$ (Effective troposphere-land heat capacity)                                 | 0.52                              | W yr m <sup>-2</sup> K <sup>-1</sup> | (Tanaka et al., 2007) |
| $C_{AS}$ (Effective troposphere-ocean mixed layer heat capacity)                    | 7.8                               |                                      |                       |
| $b_{SI}$ (Marine surface air warming enhancement)                                   | 1.3                               | unitless                             |                       |
| $f_L$ (Fractional land area)                                                        | 0.29                              |                                      |                       |

|                                                           |      |                                      |                                            |
|-----------------------------------------------------------|------|--------------------------------------|--------------------------------------------|
| $c_v$ (Specific heat capacity of seawater)                | 0.13 | W yr m <sup>-2</sup> K <sup>-1</sup> |                                            |
| $a_k$ (Heat exchange coefficient parameter)               | 0.31 | unitless                             |                                            |
| $b_k$ (Heat exchange coefficient parameter)               | 1.59 | W yr m <sup>-2</sup> K <sup>-1</sup> |                                            |
| $Q_{2x}$ (Radiative forcing for atmospheric CO2 doubling) | 3.75 | W m <sup>-2</sup>                    |                                            |
| $\kappa_v$ (ocean heat diffusivity)                       | 2.38 | cm <sup>2</sup> s <sup>-1</sup>      | See section 2.2.6 of main text for details |



47 **Table S11. Models and references used to calculate Hector preindustrial sea surface temperatures.**48 Table of the 24 ESM historical output files that were processed to find the global, high latitude, and low latitude mean  
49 preindustrial sea surface temperature, which are used by Hector's ocean component.  
50

| <b>Model</b>      | <b>Citation</b>                                    |
|-------------------|----------------------------------------------------|
| ACCESS-ESM1-5     | (Ziehn et al., 2019a, b)                           |
| CanESM5           | (Swart et al., 2019a, b)                           |
| EC-Earth3         | (EC-Earth Consortium, 2019a)                       |
| MIROC6            | (Tatebe and Watanabe, 2018; Shiogama et al., 2019) |
| MPI-ESM1-2-HR     | (Jungclaus et al., 2019)                           |
| MPI-ESM1-2-LR     | (Wieners et al., 2019)                             |
| NorCPM1           | (Bethke et al., 2019)                              |
| CNRM-CM6-1        | (Voldoire, 2018)                                   |
| CNRM-ESM2-1       | (Seferian, 2018)                                   |
| MIROC-ES2L        | (Hajima et al., 2019)                              |
| ACCESS-CM2        | (Dix et al., 2019a, b)                             |
| AWI-CM-1-1-MR     | (Semmler et al., 2018)                             |
| CMCC-CM2-HR4      | (Scoccimarro et al., 2020)                         |
| CMCC-CM2-SR5      | (Lovato and Peano, 2020a)                          |
| CMCC-ESM2         | (Lovato et al., 2021a, b)                          |
| EC-Earth3-AerChem | (EC-Earth Consortium, 2020)                        |
| EC-Earth3-CC      | (EC-Earth Consortium, 2021)                        |
| EC-Earth3-Veg-LR  | (EC-Earth Consortium, 2019b)                       |
| MPI-ESM1-2-HAM    | (Neubauer et al., 2019)                            |
| MRI-ESM2-0        | (Yukimoto et al., 2019b, a)                        |
| NorESM2-LM        | (Seland et al., 2019)                              |
| NorESM2-MM        | (Bentsen et al., 2019)                             |
| CNRM-CM6-1-HR     | (Voldoire, 2018)                                   |
| EC-Earth3-Veg     | (EC-Earth Consortium, 2019b)                       |

51 **Table S12. Earth System Models used in the CMIP6 comparison.**

| <b>Model</b>    | <b>Ensemble</b> | <b>Citation</b>                                    |
|-----------------|-----------------|----------------------------------------------------|
| ACCESS-CM2      | r1i1p1f1        | (Dix et al., 2019a, b)                             |
| ACCESS-ESM1-5   | r10i1p1f1       | (Ziehn et al., 2019a, b)                           |
| CAMS-CSM1-0     | r1i1p1f1        | (Rong, 2019)                                       |
| CanESM5         | r10i1p1f1       | (Swart et al., 2019a, b)                           |
| CESM2           | r10i1p1f1       | (Danabasoglu, 2019a)                               |
| CESM2-WACCM     | r1i1p1f1        | (Danabasoglu, 2019b)                               |
| CMCC-CM2-SR5    | r1i1p1f1        | (Lovato and Peano, 2020b)                          |
| CMCC-ESM2       | r1i1p1f1        | (Lovato et al., 2021a, b)                          |
| HadGEM3-GC31-LL | r1i1p1f3        | (Good, 2019)                                       |
| MIROC-ES2L      | r10i1p1f2       | (Tachiiri et al., 2019)                            |
| MIROC6          | r10i1p1f1       | (Tatebe and Watanabe, 2018; Shiogama et al., 2019) |
| MRI-ESM2-0      | r1i1p1f1        | (Yukimoto et al., 2019b, a)                        |
| NorESM2-MM      | r1i1p1f1        | (Bentsen et al., 2019)                             |
| TaiESM1         | r1i1p1f1        | (Lee and Liang, 2020)                              |
| UKESM1-0-LL     | r10i1p1f2       | (Good et al., 2019)                                |

52

53 **SI References**

- 54 Bentsen, M., Olivieri, D. J. L., Seland, Ø., Toniazzo, T., Gjermundsen, A., Graff, L. S., Debernard, J. B., Gupta, A. K., He, Y.,  
55 Kirkevåg, A., Schwinger, J., Tjiputra, J., Aas, K. S., Bethke, I., Fan, Y., Griesfeller, J., Grini, A., Guo, C., Ilicak, M., Karset,  
56 I. H. H., Landgren, O. A., Liakka, J., Moseid, K. O., Nummelin, A., Spensberger, C., Tang, H., Zhang, Z., Heinze, C.,  
57 Iversen, T., and Schulz, M.: NCC NorESM2-MM model output prepared for CMIP6 ScenarioMIP,  
58 <https://doi.org/10.22033/ESGF/CMIP6.608>, 2019.
- 59 Bethke, I., Wang, Y., Counillon, F., Kimmritz, M., Fransner, F., Samuelson, A., Langehaug, H. R., Chiu, P.-G., Bentsen, M.,  
60 Guo, C., Tjiputra, J., Kirkevåg, A., Olivieri, D. J. L., Seland, Ø., Fan, Y., Lawrence, P., Eldevik, T., and Keenlyside, N.: NCC  
61 NorCPM1 model output prepared for CMIP6 CMIP historical, <https://doi.org/10.22033/ESGF/CMIP6.10894>, 2019.
- 62 Danabasoglu, G.: NCAR CESM2 model output prepared for CMIP6 ScenarioMIP,  
63 <https://doi.org/10.22033/ESGF/CMIP6.2201>, 2019a.
- 64 Danabasoglu, G.: NCAR CESM2-WACCM model output prepared for CMIP6 ScenarioMIP,  
65 <https://doi.org/10.22033/ESGF/CMIP6.10026>, 2019b.
- 66 Dix, M., Bi, D., Dobrohotoff, P., Fiedler, R., Harman, I., Law, R., Mackallah, C., Marsland, S., O'Farrell, S., Rashid, H.,  
67 Srbinovsky, J., Sullivan, A., Trenham, C., Vohralik, P., Watterson, I., Williams, G., Woodhouse, M., Bodman, R., Dias, F.  
68 B., Domingues, C. M., Hannah, N., Heerdegen, A., Savita, A., Wales, S., Allen, C., Druken, K., Evans, B., Richards, C.,  
69 Ridzwan, S. M., Roberts, D., Smillie, J., Snow, K., Ward, M., and Yang, R.: CSIRO-ARCCSS ACCESS-CM2 model output  
70 prepared for CMIP6 CMIP historical, <https://doi.org/10.22033/ESGF/CMIP6.4271>, 2019a.
- 71 Dix, M., Bi, D., Dobrohotoff, P., Fiedler, R., Harman, I., Law, R., Mackallah, C., Marsland, S., O'Farrell, S., Rashid, H.,  
72 Srbinovsky, J., Sullivan, A., Trenham, C., Vohralik, P., Watterson, I., Williams, G., Woodhouse, M., Bodman, R., Dias, F.  
73 B., Domingues, C. M., Hannah, N., Heerdegen, A., Savita, A., Wales, S., Allen, C., Druken, K., Evans, B., Richards, C.,  
74 Ridzwan, S. M., Roberts, D., Smillie, J., Snow, K., Ward, M., and Yang, R.: CSIRO-ARCCSS ACCESS-CM2 model output  
75 prepared for CMIP6 ScenarioMIP, <https://doi.org/10.22033/ESGF/CMIP6.2285>, 2019b.
- 76 EC-Earth Consortium (EC-Earth): EC-Earth-Consortium EC-Earth3 model output prepared for CMIP6 CMIP historical,  
77 <https://doi.org/10.22033/ESGF/CMIP6.4700>, 2019a.
- 78 EC-Earth Consortium (EC-Earth): EC-Earth-Consortium EC-Earth3-Veg model output prepared for CMIP6 CMIP historical,  
79 <https://doi.org/10.22033/ESGF/CMIP6.4706>, 2019b.
- 80 EC-Earth Consortium (EC-Earth): EC-Earth-Consortium EC-Earth3-AerChem model output prepared for CMIP6 CMIP  
81 historical, <https://doi.org/10.22033/ESGF/CMIP6.4701>, 2020.
- 82 EC-Earth Consortium (EC-Earth): EC-Earth-Consortium EC-Earth-3-CC model output prepared for CMIP6 CMIP historical,  
83 <https://doi.org/10.22033/ESGF/CMIP6.4702>, 2021.
- 84 Good, P.: MOHC HadGEM3-GC31-LL model output prepared for CMIP6 ScenarioMIP,  
85 <https://doi.org/10.22033/ESGF/CMIP6.10845>, 2019.
- 86 Good, P., Sellar, A., Tang, Y., Rumbold, S., Ellis, R., Kelley, D., Kuhlbrodt, T., and Walton, J.: MOHC UKESM1.0-LL  
87 model output prepared for CMIP6 ScenarioMIP, <https://doi.org/10.22033/ESGF/CMIP6.1567>, 2019.
- 88 Hajima, T., Abe, M., Arakawa, O., Suzuki, T., Komuro, Y., Ogura, T., Ogochi, K., Watanabe, M., Yamamoto, A., Tatebe,  
89 H., Noguchi, M. A., Ohgaito, R., Ito, A., Yamazaki, D., Ito, A., Takata, K., Watanabe, S., Kawamiya, M., and Tachiiri, K.:

- 90 MIROC MIROC-ES2L model output prepared for CMIP6 CMIP historical, <https://doi.org/10.22033/ESGF/CMIP6.5602>,  
91 2019.
- 92 Hartin, C. A., Patel, P., Schwarber, A., Link, R. P., and Bond-Lamberty, B. P.: A simple object-oriented and open-source  
93 model for scientific and policy analyses of the global climate system--Hector v1. 0, *Geoscientific Model Development*, 8,  
94 939–955, 2015.
- 95 Hartin, C. A., Bond-Lamberty, B., and Patel, P.: Ocean acidification over the next three centuries using a simple global  
96 climate carbon-cycle model: projections and sensitivities, *Biogeosciences*, 2016.
- 97 Ito, A.: A historical meta-analysis of global terrestrial net primary productivity: are estimates converging?, *Glob. Chang.*  
98 *Biol.*, 17, 3161–3175, 2011.
- 99 Jungclaus, J., Bittner, M., Wieners, K.-H., Wachsmann, F., Schupfner, M., Legutke, S., Giorgetta, M., Reick, C., Gayler, V.,  
100 Haak, H., de Vrese, P., Raddatz, T., Esch, M., Mauritsen, T., von Storch, J.-S., Behrens, J., Brovkin, V., Claussen, M.,  
101 Crueger, T., Fast, I., Fiedler, S., Hagemann, S., Hohenegger, C., Jahns, T., Kloster, S., Kinne, S., Lasslop, G., Kornblueh, L.,  
102 Marotzke, J., Matei, D., Meraner, K., Mikolajewicz, U., Modali, K., Müller, W., Nabel, J., Notz, D., Peters-von Gehlen, K.,  
103 Pincus, R., Pohlmann, H., Pongratz, J., Rast, S., Schmidt, H., Schnur, R., Schulzweida, U., Six, K., Stevens, B., Voigt, A.,  
104 and Roeckner, E.: MPI-M MPI-ESM1.2-HR model output prepared for CMIP6 CMIP historical,  
105 <https://doi.org/10.22033/ESGF/CMIP6.6594>, 2019.
- 106 Lee, W.-L. and Liang, H.-C.: AS-RCEC TaiESM1.0 model output prepared for CMIP6 ScenarioMIP,  
107 <https://doi.org/10.22033/ESGF/CMIP6.9688>, 2020.
- 108 Lovato, T. and Peano, D.: CMCC CMCC-CM2-SR5 model output prepared for CMIP6 CMIP historical,  
109 <https://doi.org/10.22033/ESGF/CMIP6.3825>, 2020a.
- 110 Lovato, T. and Peano, D.: CMCC CMCC-CM2-SR5 model output prepared for CMIP6 ScenarioMIP,  
111 <https://doi.org/10.22033/ESGF/CMIP6.1365>, 2020b.
- 112 Lovato, T., Peano, D., and Butenschön, M.: CMCC CMCC-ESM2 model output prepared for CMIP6 CMIP historical,  
113 <https://doi.org/10.22033/ESGF/CMIP6.13195>, 2021a.
- 114 Lovato, T., Peano, D., and Butenschön, M.: CMCC CMCC-ESM2 model output prepared for CMIP6 ScenarioMIP,  
115 <https://doi.org/10.22033/ESGF/CMIP6.13168>, 2021b.
- 116 Neubauer, D., Ferrachat, S., Siegenthaler-Le Drian, C., Stoll, J., Folini, D. S., Tegen, I., Wieners, K.-H., Mauritsen, T.,  
117 Stemmler, I., Barthel, S., Bey, I., Daskalakis, N., Heinold, B., Kokkola, H., Partridge, D., Rast, S., Schmidt, H., Schutgens,  
118 N., Stanelle, T., Stier, P., Watson-Parris, D., and Lohmann, U.: HAMMOZ-Consortium MPI-ESM1.2-HAM model output  
119 prepared for CMIP6 CMIP historical, <https://doi.org/10.22033/ESGF/CMIP6.5016>, 2019.
- 120 Rong, X.: CAMS CAMS-CSM1.0 model output prepared for CMIP6 ScenarioMIP,  
121 <https://doi.org/10.22033/ESGF/CMIP6.11004>, 2019.
- 122 Scoccimarro, E., Bellucci, A., and Peano, D.: CMCC CMCC-CM2-HR4 model output prepared for CMIP6 CMIP historical,  
123 <https://doi.org/10.22033/ESGF/CMIP6.3823>, 2020.
- 124 Seferian, R.: CNRM-CERFACS CNRM-ESM2-1 model output prepared for CMIP6 CMIP historical,  
125 <https://doi.org/10.22033/ESGF/CMIP6.4068>, 2018.

- 126 Seland, Ø., Bentsen, M., Olivieri, D. J. L., Toniazzi, T., Gjermundsen, A., Graff, L. S., Debernard, J. B., Gupta, A. K., He, Y.,  
127 Kirkevåg, A., Schwinger, J., Tjiputra, J., Aas, K. S., Bethke, I., Fan, Y., Griesfeller, J., Grini, A., Guo, C., Ilicak, M., Karset,  
128 I. H. H., Landgren, O. A., Liakka, J., Moseid, K. O., Nummelin, A., Spensberger, C., Tang, H., Zhang, Z., Heinze, C.,  
129 Iversen, T., and Schulz, M.: NCC NorESM2-LM model output prepared for CMIP6 CMIP historical,  
130 <https://doi.org/10.22033/ESGF/CMIP6.8036>, 2019.
- 131 Semmler, T., Danilov, S., Rackow, T., Sidorenko, D., Barbi, D., Hegewald, J., Sein, D., Wang, Q., and Jung, T.: AWI AWI-  
132 CM1.1MR model output prepared for CMIP6 CMIP historical, <https://doi.org/10.22033/ESGF/CMIP6.2686>, 2018.
- 133 Shiogama, H., Abe, M., and Tatebe, H.: MIROC MIROC6 model output prepared for CMIP6 ScenarioMIP,  
134 <https://doi.org/10.22033/ESGF/CMIP6.898>, 2019.
- 135 Smith, C., Nicholls, Z. R. J., Armour, K., Collins, W., Forster, P., Meinshausen, M., Palmer, M. D., and Watanabe, M.: The  
136 Earth's Energy Budget, Climate Feedbacks, and Climate Sensitivity Supplementary Material, in: Climate Change 2021: The  
137 Physical Science Basis. Contribution of Working Group I to the Sixth Assessment Report of the Intergovernmental Panel on  
138 Climate Change, edited by: Masson-Delmotte, V., Zhai, P., Pirani, A., Connors, S. L., Péan, C., Berger, S., Caud, N., Chen,  
139 Y., Goldfarb, L., Gomis, M. I., Huang, M., Leitzell, K., Lonnoy, E., Matthews, J. B. R., Maycock, T. K., Waterfield, T.,  
140 Yelekçi, O., Yu, R., and Zhou, B., 2021.
- 141 Swart, N. C., Cole, J. N. S., Kharin, V. V., Lazare, M., Scinocca, J. F., Gillett, N. P., Anstey, J., Arora, V., Christian, J. R.,  
142 Jiao, Y., Lee, W. G., Majaess, F., Saenko, O. A., Seiler, C., Seinen, C., Shao, A., Solheim, L., von Salzen, K., Yang, D.,  
143 Winter, B., and Sigmond, M.: CCCma CanESM5 model output prepared for CMIP6 CMIP historical,  
144 <https://doi.org/10.22033/ESGF/CMIP6.3610>, 2019a.
- 145 Swart, N. C., Cole, J. N. S., Kharin, V. V., Lazare, M., Scinocca, J. F., Gillett, N. P., Anstey, J., Arora, V., Christian, J. R.,  
146 Jiao, Y., Lee, W. G., Majaess, F., Saenko, O. A., Seiler, C., Seinen, C., Shao, A., Solheim, L., von Salzen, K., Yang, D.,  
147 Winter, B., and Sigmond, M.: CCCma CanESM5 model output prepared for CMIP6 ScenarioMIP,  
148 <https://doi.org/10.22033/ESGF/CMIP6.1317>, 2019b.
- 149 Tachiiri, K., Abe, M., Hajima, T., Arakawa, O., Suzuki, T., Komuro, Y., Ogochi, K., Watanabe, M., Yamamoto, A., Tatebe,  
150 H., Noguchi, M. A., Ohgaito, R., Ito, A., Yamazaki, D., Ito, A., Takata, K., Watanabe, S., and Kawamiya, M.: MIROC  
151 MIROC-ES2L model output prepared for CMIP6 ScenarioMIP, <https://doi.org/10.22033/ESGF/CMIP6.936>, 2019.
- 152 Tanaka, K., Kriegler, E., Bruckner, T., Hooss, G., Knorr, W., and Raddatz, T.: Aggregated carbon cycle, atmospheric  
153 chemistry, and climate model (ACC2), Reports on Earth Systems Science, 40, 2007.
- 154 Tatebe, H. and Watanabe, M.: MIROC MIROC6 model output prepared for CMIP6 CMIP historical,  
155 <https://doi.org/10.22033/ESGF/CMIP6.5603>, 2018.
- 156 Voltaire, A.: CMIP6 simulations of the CNRM-CERFACS based on CNRM-CM6-1 model for CMIP experiment historical,  
157 <https://doi.org/10.22033/ESGF/CMIP6.4066>, 2018.
- 158 Wieners, K.-H., Giorgetta, M., Jungclaus, J., Reick, C., Esch, M., Bittner, M., Legutke, S., Schupfner, M., Wachsmann, F.,  
159 Gayler, V., Haak, H., de Vrese, P., Raddatz, T., Mauritsen, T., von Storch, J.-S., Behrens, J., Brovkin, V., Claussen, M.,  
160 Crueger, T., Fast, I., Fiedler, S., Hagemann, S., Hohenegger, C., Jahns, T., Kloster, S., Kinne, S., Lasslop, G., Kornbluh, L.,  
161 Marotzke, J., Matei, D., Meraner, K., Mikolajewicz, U., Modali, K., Müller, W., Nabel, J., Notz, D., Peters-von Gehlen, K.,  
162 Pincus, R., Pohlmann, H., Pongratz, J., Rast, S., Schmidt, H., Schnur, R., Schulzweida, U., Six, K., Stevens, B., Voigt, A.,  
163 and Roeckner, E.: MPI-M MPI-ESM1.2-LR model output prepared for CMIP6 CMIP historical,  
164 <https://doi.org/10.22033/ESGF/CMIP6.6595>, 2019.

- 165 Yukimoto, S., Koshiro, T., Kawai, H., Oshima, N., Yoshida, K., Urakawa, S., Tsujino, H., Deushi, M., Tanaka, T., Hosaka,  
166 M., Yoshimura, H., Shindo, E., Mizuta, R., Ishii, M., Obata, A., and Adachi, Y.: MRI MRI-ESM2.0 model output prepared  
167 for CMIP6 CMIP historical, <https://doi.org/10.22033/ESGF/CMIP6.6842>, 2019a.
- 168 Yukimoto, S., Koshiro, T., Kawai, H., Oshima, N., Yoshida, K., Urakawa, S., Tsujino, H., Deushi, M., Tanaka, T., Hosaka,  
169 M., Yoshimura, H., Shindo, E., Mizuta, R., Ishii, M., Obata, A., and Adachi, Y.: MRI MRI-ESM2.0 model output prepared  
170 for CMIP6 ScenarioMIP, <https://doi.org/10.22033/ESGF/CMIP6.638>, 2019b.
- 171 Zelinka, M. D., Smith, C. J., Qin, Y., and Taylor, K. E.: Comparison of methods to estimate aerosol effective radiative  
172 forcings in climate models, *Atmos. Chem. Phys.*, 23, 8879–8898, 2023.
- 173 Ziehn, T., Chamberlain, M., Lenton, A., Law, R., Bodman, R., Dix, M., Wang, Y., Dobrohotoff, P., Srbinovsky, J., Stevens,  
174 L., Vohralik, P., Mackallah, C., Sullivan, A., O’Farrell, S., and Druken, K.: CSIRO ACCESS-ESM1.5 model output  
175 prepared for CMIP6 CMIP historical, <https://doi.org/10.22033/ESGF/CMIP6.4272>, 2019a.
- 176 Ziehn, T., Chamberlain, M., Lenton, A., Law, R., Bodman, R., Dix, M., Wang, Y., Dobrohotoff, P., Srbinovsky, J., Stevens,  
177 L., Vohralik, P., Mackallah, C., Sullivan, A., O’Farrell, S., and Druken, K.: CSIRO ACCESS-ESM1.5 model output  
178 prepared for CMIP6 ScenarioMIP, <https://doi.org/10.22033/ESGF/CMIP6.2291>, 2019b.
